# Supplementary material for: Stereoselective E/Z photoisomerization of oxazolidinone functionalized enecarbamates: direct and triplet sensitized irradiation
Source: Royal Society of Chemistry journal article supplement (doi:10.1039/b504413h), 2005-01-01
Supplement: b504413h.pdf [file b504413h.pdf]

## Supporting Information

### **Stereoselective *E/Z* Photoisomerization of Oxazolidinone Functionalized Enecarbamates: Direct and Triplet Sensitized Irradiation.**

Hideaki Saito,<sup>†,‡</sup> J. Sivaguru,<sup>†</sup> Steffen Jockusch,<sup>†</sup> Yoshihisa Inoue,<sup>\*,‡,§</sup> Waldemar Adam,<sup>\*,#</sup> and Nicholas J. Turro<sup>\*,†</sup>

<sup>†</sup>*The Department of Chemistry and the Department of Chemical Engineering, Columbia University, 3000 Broadway, Mail Code 3119, New York, NY 10027*

<sup>‡</sup>*The Department of Molecular Chemistry, Osaka University, 2-1 Yamada-oka, Suita 565-0871, Japan*

<sup>§</sup>*Entropy Control Project, ICORP, JST, 4-6-3 Kamishinden, Toyonaka 560-0085, Japan*

<sup>#</sup>*Institute für Organische Chemie, Universität Würzburg, 97074 Würzburg, Germany, and the Department of Chemistry, University of Puerto Rico, Rio Piedras, PR 00931*

*E-mail: njt3@columbia.edu*

#### **Contents**

- 1. Materials and Methods**
- 2. Compounds Characterization**
- 3. Synthesis of chiral sensitizers**
- 4. Photoreactions**
- 5. Typical <sup>1</sup>H NMR Spectra of Photoisomerization of 1Z with the sensitizer 3c in CD<sub>3</sub>OD: Temperature Effect**
- 6. Comparison of Directirradiation of Z-enecarbamates at 254 and 300 nm**
- 7. References**

## 1. Materials and Methods

Deuterated solvents obtained from Cambridge Isotope Labs were used as received. Products ratio and diastereoselectivities were determined by  $^1\text{H}$  NMR (300MHz, Bruker). The *Z* and *E* enecarbamates were synthesized as previously described.<sup>S1</sup>

## 2. Compounds Characterization

### ***E*-(4*R*,3'*R*)-3-(2',3'-Diphenylbut-1'-enyl)-4-isopropylloxazolidin-2-one**

[(*E*,4*R*,3'*R*)-1]:  $^1\text{H}$  NMR (300 MHz,  $\text{CDCl}_3$ )  $\delta$  = 0.76 (d,  $J$  = 7.03, 3H), 0.86 (d,  $J$  = 6.85, 3H), 1.33 (d,  $J$  = 7.20, 3H), 2.00-2.12 (m, 1H), 3.65 (ddd,  $J$  = 8.10, 4.23, 3.66, 1H), 4.04 (dd,  $J$  = 8.95, 4.33, 1H), 4.10 (t,  $J$  = 8.68, 1H), 4.32 (q,  $J$  = 7.20, 1H), 5.89 (s, 1H), 6.96-7.01 (m, 2H), 7.10-7.22 (m, 8H);  $^{13}\text{C}$  NMR (75 MHz,  $\text{CDCl}_3$ )  $\delta$  = 14.6, 17.8, 18.4, 28.2, 39.2, 62.7, 63.1, 121.0, 126.3, 127.5, 127.6 (2C), 127.7 (2C), 128.2 (2C), 129.0 (2C), 138.9, 143.1, 146.1, 157.1; MS (FAB):  $\text{M}+\text{H}^+$  calcd 336.1958, exptl 336.1972.

### ***E*-(4*R*,3'*S*)-3-(2',3'-Diphenylbut-1'-enyl)-4-isopropylloxazolidin-2-one**

[(*E*,4*R*,3'*S*)-1]:  $^1\text{H}$  NMR (300 MHz,  $\text{CDCl}_3$ )  $\delta$  = 0.87 (d,  $J$  = 6.92, 6H), 1.39 (d,  $J$  = 7.20, 3H), 2.01-2.15 (m, 1H), 3.75 (ddd,  $J$  = 8.70, 4.78, 3.92, 1H), 4.08 (dd,  $J$  = 8.95, 4.88, 1H), 4.19 (t,  $J$  = 8.80, 1H), 4.28 (q,  $J$  = 7.20, 1H), 5.88 (s, 1H), 6.84-6.87 (m, 2H), 7.07-7.27 (m, 8H);  $^{13}\text{C}$  NMR (75 MHz,  $\text{CDCl}_3$ )  $\delta$  = 15.6, 17.3, 18.6, 29.5, 39.5, 63.2, 63.9, 121.9, 126.7, 127.9, 128.0 (4C), 128.7 (2C), 129.4 (2C), 138.4, 142.2, 144.9, 157.1; MS (FAB):  $\text{M}+\text{H}^+$  calcd 336.1958, exptl 336.1961.

### ***E*-(4*S*,3'*S*)-3-(2',3'-Diphenylbut-1'-enyl)-4-isopropylloxazolidin-2-one**

[(*E*,4*S*,3'*S*)-1]:  $^1\text{H}$  NMR (300 MHz,  $\text{CDCl}_3$ )  $\delta$  = 0.85 (d, 3H), 0.92 (d, 3H), 1.42 (d, 3H), 2.11-2.18 (m, 1H), 3.71-3.76 (ddd, 1H), 4.12 (dd, 1H), 4.19 (t, 1H), 4.41 (q, 1H), 5.97 (s, 1H), 7.06-7.11 (m, 2H), 7.20-7.34 (m, 8H);  $^{13}\text{C}$  NMR (75 MHz,  $\text{CDCl}_3$ )  $\delta$  = 15.1, 18.5, 19.0, 28.2, 39.9, 62.9, 63.2, 121.4, 126.7, 127.9, 128.1 (4C), 128.7 (2C), 129.5 (2C), 138.9, 143.3, 146.6, 157.1; MS (FAB)  $\text{M}+\text{H}^+$  calcd 336.1958, exptl 336.1952.

### ***E*-(4*S*,3'*R*)-3-(2',3'-Diphenylbut-1'-enyl)-4-isopropylloxazolidin-2-one**

[(*E*,4*S*,3'*R*)-1]:  $^1\text{H}$  NMR (300 MHz,  $\text{CDCl}_3$ )  $\delta$  = 0.96 (d, 6H), 1.42 (d, 3H), 2.12-2.22 (m, 1H), 3.81-3.87 (ddd, 1H), 4.16 (dd, 1H), 4.28 (t, 1H), 4.37 (q, 1H), 5.96 (s, 1H), 6.93-6.97 (m, 2H), 7.16-7.35 (m, 8H);  $^{13}\text{C}$  NMR (75 MHz,  $\text{CDCl}_3$ )  $\delta$  = 15.6, 17.3, 18.6, 29.5, 39.5, 63.2, 63.9, 121.9, 126.7, 127.9, 128.0 (4C), 128.7 (2C), 129.4 (2C), 138.4, 142.2, 144.9, 157.1; MS (FAB)  $\text{M}+\text{H}^+$  calcd 336.1958, exptl 336.1950.

### ***Z*-(4*S*,3'*R*)-3-(2',3'-Diphenylbut-1'-enyl)-4-isopropylloxazolidin-2-one**

[(*Z*,4*S*,3'*R*)-1]:  $^1\text{H}$  NMR (300 MHz,  $\text{CDCl}_3$ )  $\delta$  = 0.40 (d,  $J$  = 7.10, 3H), 0.75 (d,  $J$  = 6.88, 3H), 1.43 (d,  $J$  = 7.20, 3H), 1.74-1.85 (m, 1H), 2.85 (td,  $J$  = 5.70, 3.10, 1H), 3.89 (q,  $J$  = 7.20, 1H), 3.95 (d,  $J$  = 5.70, 2H), 6.70 (s, 1H), 6.82-6.86 (m, 2H), 7.18-7.28 (m, 8H);  $^{13}\text{C}$

NMR (75 MHz, CD<sub>3</sub>CN)  $\delta$  = 13.2, 16.8, 20.4, 27.2, 45.8, 59.2, 63.0, 120.0, 126.6, 127.7, 128.0, 128.3, 128.6, 128.8, 129.2, 133.4, 138.8, 144.8

**Z-(4*S*,3'*S*)-3-(2',3'-Diphenylbut-1'-enyl)-4-isopropylloxazolidin-2-one**

[(*Z*,4*S*,3'*S*)-1]: <sup>1</sup>H NMR (300 MHz, CDCl<sub>3</sub>)  $\delta$  = 0.43 (d, *J* = 7.10, 3H), 0.72 (d, *J* = 6.87, 3H), 1.51 (d, *J* = 7.20, 3H), 1.78-1.89 (m, 1H), 2.87 (td, *J* = 5.80, 3.10, 1H), 3.75 (q, *J* = 7.20, 1H), 3.94 (d, *J* = 5.80, 2H), 6.46 (s, 1H), 6.96-6.99 (m, 2H), 7.18-7.36 (m, 8H); <sup>13</sup>C NMR (75 MHz, CD<sub>3</sub>CN)  $\delta$  = 13.3, 16.8, 20.3, 27.2, 46.3, 59.3, 63.0, 120.5, 126.8, 127.8, 128.0, 128.4, 128.6, 128.8, 129.5, 134.8, 139.6, 145.0

### 3. Synthesis of chiral sensitizers

**General.** Mitsunobu reaction<sup>S2, S3</sup> was applied for the synthesis of chiral sensitizers (**3b~3d**).

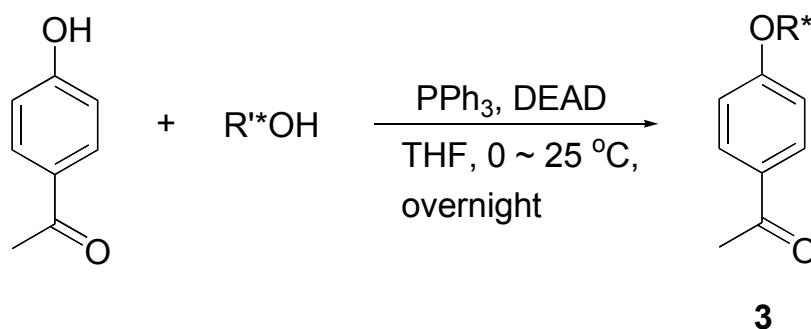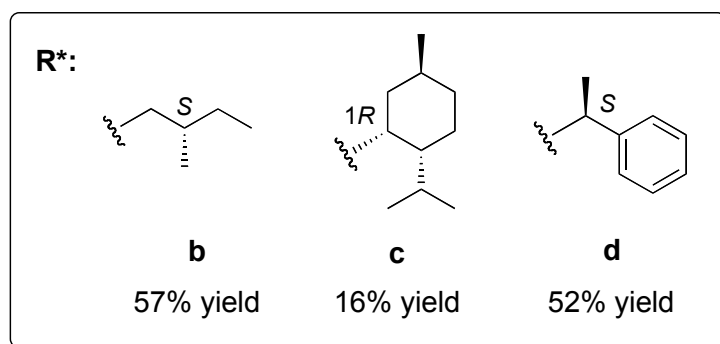

**(S)-2-Methyl-1-butyl ether of 4'-hydroxyacetophenone (3b):** 4'-Hydroxyacetophenone (6.9 g, 51 mmol), triphenylphosphine (13.4 g, 51 mmol) and (S)-2-methyl-1-butanol (3.0 g, 34 mmol) were stirred in 60 mL of dry THF under N<sub>2</sub> at 0 °C. Diethyl azodicarboxylate (DEAD, 8.9 g, 51 mmol) was added into the solution by drop wise for 20 min, followed by warming up to room temperature and stirred overnight. The reaction mixture was purified by silica gel chromatography (hexanes/ethyl acetate =

95/5).colorless liquid, 4.0 g (57% yield):  $^1\text{H}$  NMR (300 MHz,  $\text{CDCl}_3$ )  $\delta$  0.962 (t,  $J = 7.5$  Hz, 3H), 1.03 (d,  $J = 6$ . Hz, 3H), 1.28 (m, 1H), 1.58 (m, 1H), 1.88 (m, 1H), 2.56 (s, 3H), 3.79 (dd,  $J = 6.5, 9.0$  Hz, 1H), 3.88 (dd,  $J = 6.0, 9.0$  Hz, 1H), 6.91 (d,  $J = 6.8$  Hz, 2H), 7.91 (d,  $J = 6.8$  Hz, 2H);  $^{13}\text{C}$  NMR (75 MHz,  $\text{CDCl}_3$ )  $\delta$  11.2, 16.5, 26.0, 26.4, 34.5, 72.8, 114, 131, 163, 197 Hz.

**(1R,2R,5S)-Neomenthyl ether of 4'-hydroxyacetophenone (3c):** (1S,2R,5S)-(+)-menthol and the same procedure as for **3b** was employed. Colorless liquid (16% yield).  $^1\text{H}$  NMR (300 MHz,  $\text{CDCl}_3$ )  $\delta$  0.745 (d,  $J = 5.0$  Hz, 3H), 0.768 (d,  $J = 4.8$ , 3H), 0.854 (d,  $J = 6.6$  Hz, 3H), 0.971 (m, 1H), 1.01 (m, 2H), 1.56 (m, 3H), 1.69 (m, 2H), 2.01 (m, 1H), 2.47 (s, 3H), 4.64 (m, 1H), 6.82 (d,  $J = 8.8$  Hz, 2H), 7.82 (d,  $J = 8.8$  Hz, 2H);  $^{13}\text{C}$  NMR (75 MHz,  $\text{CDCl}_3$ )  $\delta$  21.1, 21.4, 22.6, 25.2, 26.6, 27.0, 29.7, 35.2, 38.0, 48.0, 74.1, 115, 130, 131, 163, 197 Hz.

**(S)-1-Phenyl-1-ethyl ether of 4'-hydroxyacetophenone (3d):** (*R*)-(+)-1-Phenylethanol and the same procedure as for **3b** was employed. White solid (52% yield).  $^1\text{H}$  NMR (300 MHz,  $\text{CDCl}_3$ )  $\delta$  1.66 (d,  $J = 6.4$  Hz, 3H), 2.5 (s, 3H), 5.39 (q,  $J = 6.4$  Hz, 1H), 6.89 (d,  $J = 8.8$  Hz, 2H), 7.25-7.35 (m, 5H), 7.83 (d,  $J = 8.8$  Hz, 2H);  $^{13}\text{C}$  NMR (75 MHz,  $\text{CDCl}_3$ )  $\delta$  24.9, 26.7, 76.6, 116, 126, 128, 129, 130.5, 130.9, 143, 162, 197.

#### 4. Photoreactions

**General.** Direct irradiations of encarbamates **1** in solution were performed in quartz NMR tubes by irradiating the solutions at 254 nm (monochromatic) in a Rayonet reactor. Triplet sensitizations were performed by irradiating solutions of **1** and the triplet sensitizers (**2**, **3**) at 300 nm (Gaussian distribution) under  $\text{N}_2$  atmosphere in a Rayonet reactor.

#### 5. Typical $^1\text{H}$ NMR Spectra of Photoisomerization of **1Z** with the sensitizer **3c** in $\text{CD}_3\text{OD}$ : Temperature Effect

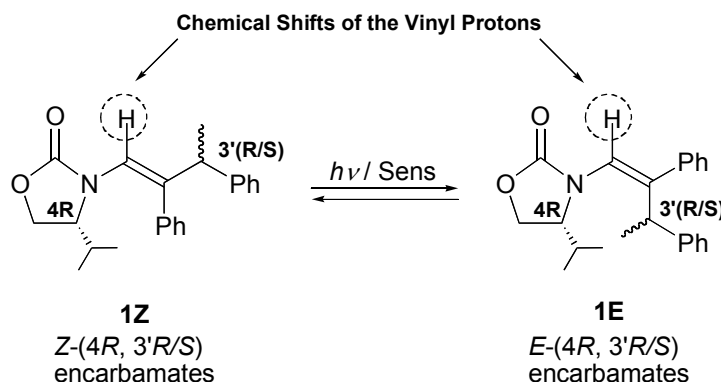

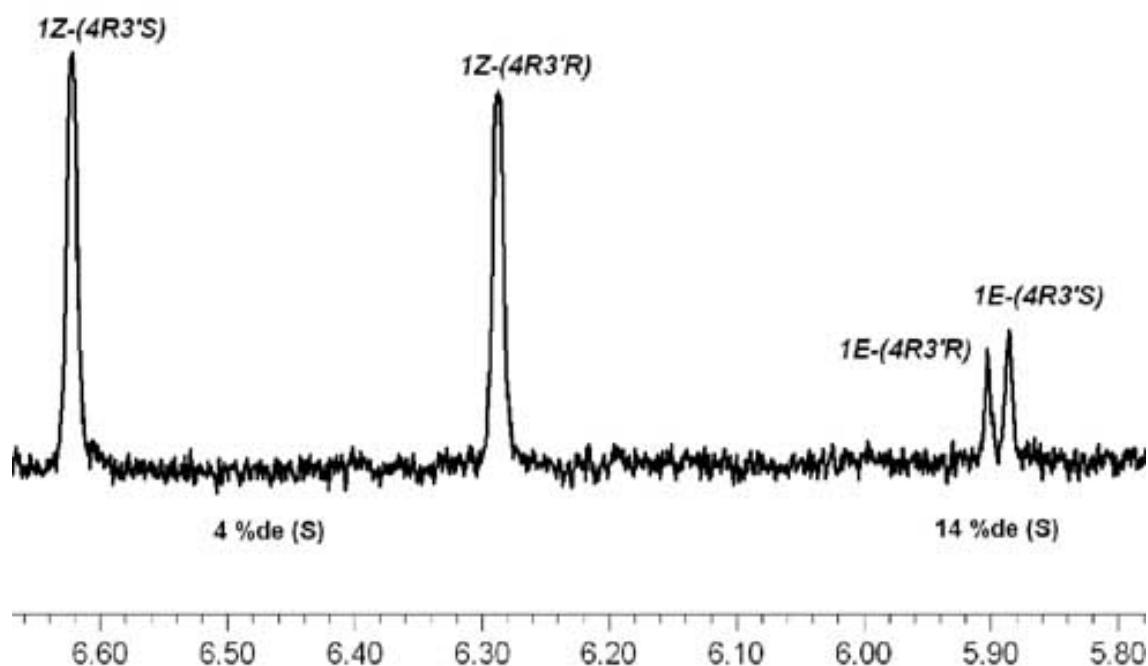

**Chart S1.** <sup>1</sup>H NMR Chemical Shift of the vinyl proton of **1Z** or **1E** after 5min Photoirradiation in CD<sub>3</sub>OD at 20°C.

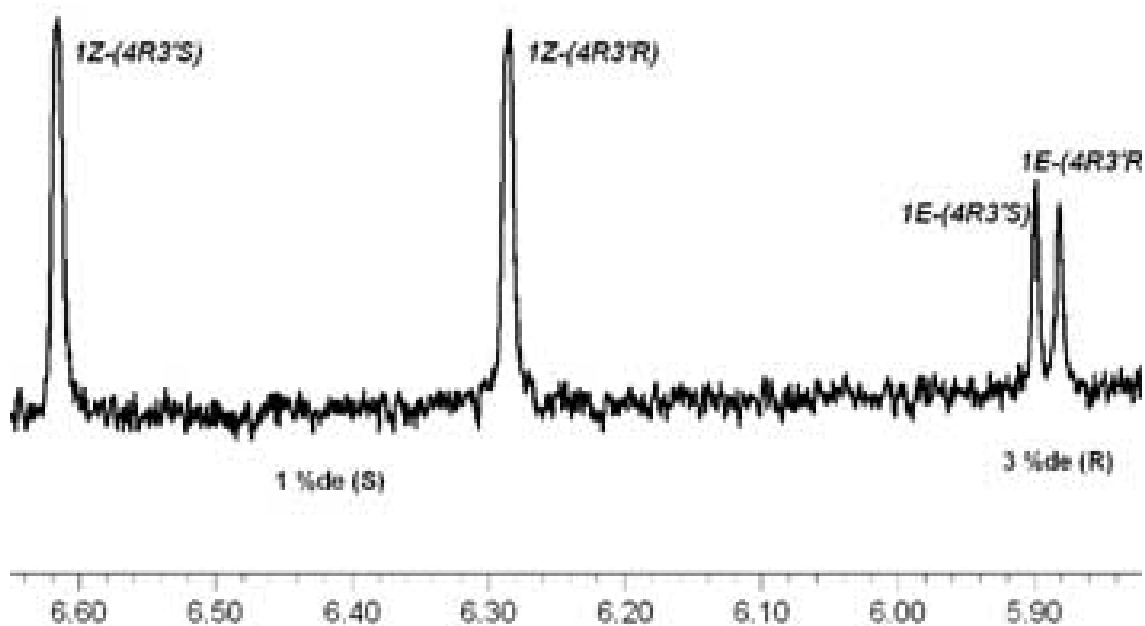

**Chart S2.** <sup>1</sup>H NMR Chemical Shift of the vinyl proton of **1Z** or **1E** after 5min Photoirradiation in CD<sub>3</sub>OD at -40°C.

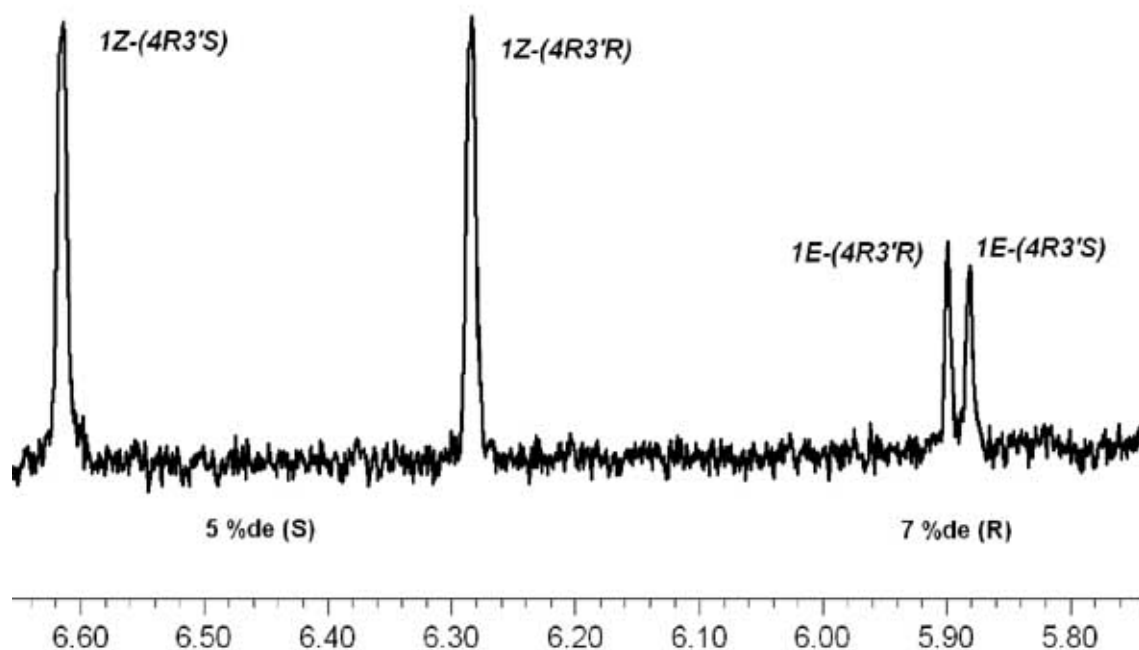

**Chart S3.**  $^1\text{H}$  NMR Chemical Shift of the vinyl proton of **1Z** or **1E** after 5 min Photoirradiation in  $\text{CD}_3\text{OD}$  at  $-65^\circ\text{C}$ .

## 6. Comparison of Directirradiation of *Z*-enecarbamates at 254 and 300 nm

**Table S1** Direct irradiation of **1Z**: *Z* : *E* ratio dependence on excitation wavelength at photo-stationary state.<sup>a</sup>

| Solvent                  | <i>Z</i> : <i>E</i> |                  |
|--------------------------|---------------------|------------------|
|                          | Irdn. at 254 nm     | Irdn. at ~300 nm |
| $\text{CD}_3\text{CN}$   | 62 : 38             | 76 : 24          |
| $\text{CD}_3\text{OD}$   | 53 : 47             | 65 : 35          |
| $\text{CD}_2\text{Cl}_2$ | 53 : 47             | 57 : 43          |
| $\text{CDCl}_3$          | 54 : 46             | 61 : 39          |
| $\text{C}_6\text{D}_6$   | 54 : 46             | -                |

<sup>a</sup> $[\mathbf{1Z}] = 4.3$  mM. Irradiations performed at  $20^\circ\text{C}$  under  $\text{N}_2$  atmosphere. de values and *Z/E* ratio determined by  $^1\text{H}$ -NMR spectroscopy.

**Table S2** Direct irradiation of **1Z** at 300 nm.<sup>a</sup>

| Solvent                         | time/min | %de ( <b>1E</b> ) <sup>b</sup> | %de ( <b>1Z</b> ) <sup>b</sup> | Z : E   |
|---------------------------------|----------|--------------------------------|--------------------------------|---------|
| CD <sub>3</sub> CN              | 1        | 4 (3'R)                        | 4 (3'S)                        | 88 : 12 |
|                                 | 2        | 5 (3'R)                        | 6 (3'S)                        | 82 : 18 |
|                                 | 5        | 2 (3'R)                        | 6 (3'S)                        | 76 : 24 |
|                                 | 10       | 1 (3'R)                        | 4 (3'S)                        | 74 : 26 |
|                                 | 15       | 2 (3'R)                        | 5 (3'S)                        | 76 : 24 |
| CD <sub>3</sub> OD              | 2        | 8 (3'S)                        | 4 (3'S)                        | 83 : 27 |
|                                 | 5        | 10 (3'S)                       | 10 (3'S)                       | 74 : 26 |
|                                 | 10       | 7 (3'S)                        | 5 (3'S)                        | 64 : 36 |
|                                 | 15       | 6 (3'S)                        | 10 (3'S)                       | 64 : 36 |
| CD <sub>2</sub> Cl <sub>2</sub> | 2        | 6 (3'S)                        | 2 (3'S)                        | 71 : 29 |
|                                 | 5        | 6 (3'S)                        | 8 (3'S)                        | 57 : 43 |
|                                 | 10       | 7 (3'S)                        | 8 (3'S)                        | 58 : 42 |
|                                 | 15       | 3 (3'S)                        | 9 (3'S)                        | 55 : 45 |
| CDCl <sub>3</sub>               | 2        | 7 (3'R)                        | 12 (3'S)                       | 81 : 19 |
|                                 | 5        | 2 (3'R)                        | 19 (3'S)                       | 61 : 39 |

<sup>a</sup> [**1Z**] = 4.3 mM. Irradiations were performed at >300 nm at 20°C in Pyrex NMR tubes under N<sub>2</sub> atmosphere. A product's de and a Z/E ratio were determined by NMR analyses.

<sup>b</sup> Stereochemistry for 3'-position of the predominated encarbamate was shown in a parenthesis.

## 7. References

- <sup>S1</sup> W. Adam, S. G. Bosio, N. J. Turro, and B. T. Wolff, *J. Org. Chem.*, 2004, **69**, 1704.  
<sup>S2</sup> O. Mitsunobu, *Synthesis*, 1981, 1.  
<sup>S3</sup> Y.-J. Shi, D. L. Hughes, and J. M. McNamara, *Tetrahedron Lett.*, 2003, **44**, 3609.
